# Supplementary material for: Identifying the predisposing factors, signs and symptoms of overreaching and overtraining in physical education professionals
Source: PeerJ. 2018 Jun 13;6:e4994. doi: 10.7717/peerj.4994 (PMC6004110; doi:10.7717/peerj.4994)
Supplement: Data S1 [file peerj-06-4994-s002.xlsx]

## Sheet: Row data
ID	Group	Training session duration (hours)	Weekly training frequency (days)	Training experience (months)	Hazards of physical training	Lasting more than 15 days	Age	BM	Height	BMI	Sex	1	2	3	4	5	6	7	8	9	10	11	12	13	14	15	16	17	18	19	20	21	22	23	24	25	26	27	28	29	30								31
																																									No	Yes	EP	PP	FP	RP	L	SE
OVT1	1	1	5	18	0		23.2329	69	169	24.1588	1	2	0	4	1	1	0	1	2	5	6	4	2	3	4	0	1	0	2	2	1	5	1	3	3	2	3	3	4	4	0								0
OVT2	1	1	4	36	1	1	23.0849	76	178	23.9869	1	3	0	0	2	2	2	0	3	5	5	5	1	2	4	4	2	1	3	2	3	5	1	3	3	3	2	1	1	0	0								0
OVT3	1	1	6	12	0		25.1315	51	155	21.2279	2	3	5	0	3	3	0	1	1	5	5	4	3	4	4	4	2	1	2	3	3	5	1	4	4	2	4	3	1	0	0								0
OVT4	1	1	4	12	1	1	30.2411	82	178	25.8806	1	4	4	4	2	3	1	1	1	4	4	5	1	2	4	4	3	2	1	1	3	5	1	3	3	3	4	4	2	0		1		1					2
OVT5	1	1	5	12	1	0	22.5836	73	177	23.3011	1	3	5	0	1	2	0	1	3	5	5	5	2	2	4	4	2	1	3	1	3	5	1	3	3	2	4	4	4	0		1	1						1
OVT6	1	1	5	6	0		21.9068	70	183	20.9024	1	2	5	4	1	2	1	1	2	5	5	5	2	2	4	0	1	1	2	1	3	5	1	4	2	1	4	3	4	0	0								2
OVT8	1	1	5	36	0		22.1233	79	179	24.6559	1	3	5	4	3	3	1	3	2	6	5	5	2	4	4	4	3	0	3	4	3	5	1	3	4	3	2	2	1	4	0								0
OVT10	1	1	5	120	0		29.4548	75	167	26.8923	1	2	5	4	2	3	1	1	1	6	6	6	2	2	4	4	2	2	2	3	3	5	1	3	3	3	2	2	2	0		1				1			1
OVT12	1	1	4	60	0		35.0849	52	166	18.8707	2	2	4	4	1	1	2	1	2	4	5	4	1	2	4	4	0	0	1	3	2	5	1	2	3	2	4	3	4	4	0								0
OVT13	1	1	5	12	0		28.9507	50	164	18.5901	2	2	4	4	1	3	1	0	2	4	5	5	2	2	4	0	1	1	2	1	0	4	1	3	3	3	4	4	4	4		1					1		2
OVT14	1	1	6	10	0		32.8466	56	168	19.8413	2	3	4	4	2	4	0	1	2	6	5	5	3	3	4	4	3	1	2	1	3	5	1	1	3	2	3	2	1	0	0								0
OVT15	1	1	4	48	0		23.1863	90	186	26.0146	1	3	0	4	1	1	0	2	1	4	5	4	1	3	0	0	1	1	3	1	2	5	1	3	3	1	4	3	4	4	0								0
OVT17	1	1	5	48	1	0	24.0411	84	181	25.6402	1	3	5	4	3	3	0	3	2	6	5	3	3	4	4	4	2	2	3	3	3	5	1	3	4	3	3	3	2	4		1		1		1			2
OVT18	1	1	6	96	0		23.3123	74	175	24.1633	1	2	5	4	1	1	0	0	3	6	6	6	3	3	0	4	1	2	3	4	3	4	1	3	3	2	4	4	3	4		1			1				2
OVT19	1	1	6	36	0		20.3068	70	178	22.0932	1	3	5	4	2	3	1	1	2	6	5	5	2	3	4	0	2	0	3	3	3	5	1	3	3	2	4	2	4	4	0								0
OVT21	1	1	4	36	0		19.2603	55	157	22.3133	2	2	5	4	1	2	0	2	4	6	6	6	1	2	4	4	3	1	4	4	3	5	1	4	4	1	4	3	4	4		1					1		1
OVT25	1	1	5	18	0		26.0658	70	180	21.6049	1	3	5	4	1	3	0	1	4	6	5	5	3	2	4	0	1	1	3	3	4	5	1	3	3	3	4	2	1	4		1				1			2
OVT26	1	1	7	144	1	1	29.9479	84	182	25.3593	1	4	5	4	3	4	2	3	1	5	5	4	4	4	0	0	3	4	3	4	4	5	1	1	4	4	3	3	4	4		1	1	1	1	1	1	1	2
OVT27	1	1	7	168	1	1	30.1205	77	173	25.7276	1	3	5	4	2	2	2	2	4	6	5	5	3	4	4	0	2	0	3	3	3	5	1	4	4	4	2	3	4	4		1						1	1
OVT30	1	1	6	300	1	1	34.6904	66	160	25.7812	2	3	5	4	1	3	0	1	2	4	5	4	3	4	0	0	2	1	3	3	1	5	1	2	3	4	4	4	2	0		1			1	1			1
OVT32	1	1	6	180	1	0	38.274	91	180	28.0864	1	2	5	4	1	3	1	1	4	7	5	7	3	4	0	4	2	1	4	4	4	5	1	3	4	2	4	2	3	4		1				1			2
OVT34	1	1	4	72	0		24.5753	75	172	25.3515	1	4	4	4	3	4	3	4	0	2	4	4	1	2	0	0	2	2	2	2	2	5	1	4	3	3	4	3	2	0		1		1		1			2
OVT35	1	1	5	60	0		38.5644	86	179	26.8406	1	4	5	4	0	4	0	2	2	7	5	7	3	4	4	4	2	0	4	4	0	5	1	4	4	4	4	4	1	4	0								0
OVT36	1	1	4	60	1		29.4959	100	184	29.5369	1	3	5	0	2	4	0	2	4	7	7	7	2	3	4	4	2	2	2	4	4	5	1	2	3	2	4	4	1	0	0								0
OVT37	1	1	4	1	1	0	24.674	90	182	27.1706	1	2	5	4	2	2	1	3	2	4	4	4	1	2	4	4	2	2	2	4	2	4	1	3	2	3	3	3	3	0		1				1		1	1
OVT38	1	1	6	18	0		24.4082	83	176	26.7949	1	3	5	4	0	2	0	0	3	6	7	7	3	2	4	4	3	0	4	4	4	2	1	2	4	3	4	3	4	4	0								0
OVT41	1	1	5	264	0		49.2959	94	167	33.705	1	2	5	4	0	2	0	2	4	6	5	5	2	2	4	0	1	0	4	3	3	5	1	3	4	2	4	4	4	4	0								0
OVT42	1	1	4	120	1	1	27.2247	63	160	24.6094	2	2	4	4	1	2	1	1	1	4	4	5	1	3	4	4	1	0	1	2	0	5	1	2	4	4	1	1	1	0		1				1		1	1
OVT43	1	1	6	36	0		37.3096	60	162	22.8624	2	3	5	4	2	3	0	1	2	6	6	5	3	4	4	0	2	1	3	4	4	5	1	2	4	4	3	2	2	4	0								0
OVT44	1	1	7	24	0		29.0767	84	174	27.7447	1	3	5	4	2	3	1	1	4	6	5	5	4	4	4	4	2	0	3	4	4	5	1	1	4	1	4	2	2	0		1				1			2
OVT45	1	1	4	84	1	0	22.2795		172	0	1	2	5	0	1	2	1	1	3	4	5	4	2	4	4	0	2	2	3	3	2	4	1	3	3	3	2	4	4	0		1			1				1
OVT47	1	1	5	24	0		21.8575	86	179	26.8406	1	2	0	0	1	1	1	1	2	5	5	5	2	4	4	4	1	1	2	3	2	5	1	2	3	1	3	1	3	0		1				1			1
OVT49	1	1	5	5	1	0	21.5726	65	160	25.3906	1	2	4	4	3	3	1	3	2	5	6	4	2	3	4	4	2	2	0	3	2	5	1	2	2	2	3	4	4	0		1		1	1			1	2
OVT53	1	1	4	6	0		24.0192	56	153	23.9224	2	3	5	4	1	2	0	1	2	5	5	5	1	2	4	0	2	1	2	3	1	5	1	2	3	3	4	3	3	0		1	1	1			1		1
OVT54	1	1	6	108	1	1	21.2384	98	176	31.6374	1	4	5	4	2	4	0	3	3	7	6	4	3	4	0	0	2	2	3	3	4	5	1	3	4	3	4	4	4	4		1		1					2
OVT55	1	1	5	6	0		26.4959	62	158	24.8358	2	3	5	0	1	2	0	1	3	4	4	4	4	3	4	0	1	1	3	4	1	4	1	4	4	3	2	2	2	0	0								0
OVT56	1	1	4	3	0		23.2959	65	166	23.5883	2	2	5	4	2	3	0	2	1	3	1	5	2	2	4	0	2	4	0	0	1	5	1	2	4	2	4	3	4	0		1			1	1		1	1
OVT57	1	1	5	48	0		19.8877	68	165	24.977	1	2	5	4	3	3	1	2	2	5	5	5	2	3	4	4	3	2	3	3	2	5	1	4	3	3	4	4	4	4		1	1			1			2
OVT58	1	1	5	5	0		22.3151	55	166	19.9594	2	2	5	4	3	3	1	1	1	5	5	5	2	2	4	4	3	1	1	1	3	4	2	3	3	3	1	1	1	0		1		1					1
OVT59	1	1	5	5	1	0	20.3534	72	163	27.0993	2	2	0	4	2	2	0	2	3	5	6	4	2	2	4	0	1	0	1	3	3	5	2	1	1	1	4	4	4	4	0								2
OVT62	1	1	6	60	0		24.7589	96	177	30.6425	1	2	0	4	2	1	0	1	3	4	5	4	2	4	4	4	2	2	3	1	2	5	1	2	2	2	4	4	4	4	0								0
OVT63	1	1	5	12	0		23.0904	80	180	24.6914	1	4	4	4	1	3	0	1	3	5	5	5	2	4	4	4	1	1	3	3	3	5	1	3	3	3	2	2	3	4	0								1
OVT64	1	1	5	9	0		19.0548	76	178	23.9869	1	4	5	4	2	3	0	2	3	5	5	4	2	4	4	0	2	1	3	4	3	5	1	2	3	1	4	4	4	0	0								0
OVT65	1	1	4	7	1	0	22.663	80	171	27.3588	1	2	4	0	1	1	0	0	2	4	5	5	1	3	4	0	1	1	3	2	3	5	1	1	2	3	1	3	4	0	0								0
OVT66	1	1	4	12	1	0	27.1863	100	183	29.8606	1	4	4	0	1	1	0	0	3	5	5	5	1	3	4	0	1	0	1	3	4	3	1	2	3	3	4	3	3	0	0								0
OVT68	1	1	6	48	1	0	24.1973	70	171	23.939	1	3	4	0	1	3	1	2	2	5	5	4	3	3	0	4	1	2	3	4	3	5	1	3	4	4	4	2	2	4	0								0
OVT70	1	1	7	144	0		37.0575	68	164	25.2826	2	3	5	0	0	1	0	0	2	4	5	5	2	2	4	0	1	1	2	3	0	5	1	2	2	3	2	3	3	0	0								1
OVT71	1	1	5	48	0		21.7781	83	175	27.102	1	3	5	4	1	2	0	1	2	5	5	5	2	2	4	4	3	3	1	4	4	5	2	2	2	2	4	2	2	0	0								0
OVT72	1	1	5	36	0		27.063	66	163	24.841	2	2	5	0	1	1	2	1	3	5	6	4	2	2	4	4	0	1	0	0	1	5	2	3	3	1	4	3	4	0	0								0
OVT75	1	1	4	48	0		26.4658	70	165	25.7117	2	1	4	0	1	2	0	2	2	5	5	5	1	2	4	4	2	1	2	3	4	5	1	3	3	3	3	2	2	0	0								0
OVT76	1	1	5	288	0		36.6438	84	168	29.7619	1	2	5	0	2	3	1	1	4	6	6	6	4	4	0	0	2	2	4	3	3	5	1	3	3	3	4	4	4	0	0								0
OVT77	1	1	5	10	0		42.4082	102	190	28.2548	1	2	5	0	0	1	0	0	4	4	5	5	2	3	4	4	1	1	3	4	3	5	1	3	3	3	4	4	4	4		1		1	1	1			1
OVT78	1	1	5	36	0		27.6822	91	190	25.2078	1	2	4	0	2	1	0	1	2	4	4	4	3	3	4	4	1	1	2	1	1	5	1	1	2	1	4	3	4	4	0								0
OVT79	1	1	5	288	0		42.1151	105	171	35.9085	1	2	5	0	0	1	0	0	4	7	7	7	2	3	0	4	1	0	4	4	4	5	1	4	4	4	4	4	4	4	0								0
OVT81	1	1	5	24	0		24.0548	65	165	23.8751	1	2	0	0	1	1	1	1	1	5	6	5	2	2	4	4	1	1	1	1	1	4	1	2	2	2	2	2	1	0	0								0
OVT82	1	1	4	3	0		20.9726	56	160	21.875	2	3	0	0	2	2	2	1	1	4	5	5	2	3	4	4	2	1	1	1	1	4	1	2	2	2	1	1	1	0		1	1		1				1
OVT86	1	1	4	48	0		29.9589	91	187	26.023	1	3	5	4	1	3	0	2	2	5	5	5	1	3	4	4	2	1	3	1	3	4	1	3	3	1	3	2	2	0	0								0
OVT87	1	1	4	36	0		46.4055	79	176	25.5036	1	3	5	4	2	2	0	1	3	4	5	5	1	3	4	4	2	1	2	3	2	5	2	2	3	2	3	2	2	0		1		1					3
OVT88	1	1	4	6	0		28.211	69	170	23.8754	1	3	0	4	2	3	1	1	1	3	3	5	1	3	4	4	1	1	1	0	1	4	1	3	3	2	4	4	3	0	0								0
OVT89	1	1	5	24	0		23.0274	55	158	22.0317	2	3	5	4	1	2	0	1	3	5	5	5	2	4	4	0	1	0	2	2	1	5	1	3	3	1	3	2	2	4	0								0
OVT90	1	1	4	3	0		19.1397	52	166	18.8707	2	2	5	4	1	2	0	1	2	5	4	5	1	2	0	4	2	1	2	3	2	4	1	4	4	2	2	4	4	0	0								0
OVT91	1	1	4	6	0		20.6082	78	173	26.0617	1	3	5	4	2	3	0	1	3	5	6	6	2	2	4	0	2	1	1	1	4	4	1	3	3	1	4	4	3	0		1			1				2
OVT93	1	1	5	18	0		23.8055	72	181	21.9774	1	1	5	0	1	2	0	0	1	3	5	6	2	3	4	0	1	1	1	4	4	4	1	3	3	2	2	4	3	0		1						1	2
OVT95	1	1	6	48	0		28.4411	73	174	24.1115	1	2	5	0	1	2	0	1	3	6	5	5	3	4	4	4	1	1	3	3	3	5	1	3	3	2	3	3	4	4	0								0
OVT103	1	1	4	240	0		32.4356	60	165	22.0386	2	2	0	4	1	2	0	2	3	5	7	6	1	3	4	4	2	0	3	3	4	5	1	3	3	2	4	4	4	4	0								0
OVT104	1	1	5	2	0		22.6932	68	170	23.5294	2	2	0	4	1	2	0	1	3	4	5	4	2	3	4	4	2	1	2	2	1	5	3	3	3	3	3	1	3	0	0								0
OVT108	1	1	4	6	1	1	24.7945	86	180	26.5432	2	3	4	4	3	4	2	3	1	4	1	5	1	2	4	4	3	4	3	4	4	5	1	3	4	3	4	3	4	0		1		1	1				4
OVT109	1	1	5	96	0		30.6466	79	179	24.6559	1	3	0	0	2	4	1	0	2	5	4	7	2	4	4	4	2	1	4	4	4	5	1	2	4	4	4	3	3	4	0								0
OVT114	1	1	5	36	0		24.7288	97	178	30.6148	1	4	4	0	1	2	1	1	3	4	4	5	2	2	4	0	2	1	2	1	2	4	1	3	3	2	4	4	4	0	0								2
OVT115	1	1	4	60	0		20.3096	64	166	23.2254	2	2	5	0	3	3	1	1	3	5	5	5	2	4	4	4	2	1	2	3	1	5	1	3	3	3	3	3	4	0	0								0
OVT116	1	1	6	72	1	0	28.7342	94	176	30.3461	1	3	5	4	2	2	0	1	2	7	5	6	3	2	4	4	1	2	2	3	2	5	1	4	4	4	4	4	4	4	0								0
OVT117	1	1	5	60	0		22.0575	43	147	19.8991	2	2	5	4	1	2	0	1	3	4	4	5	3	4	4	0	1	1	3	3	1	4	1	3	3	1	4	3	4	4		1	1						1
OVT118	1	1	6	60	0		22.4548	88	185	25.7122	1	3	5	4	2	1	1	1	3	6	5	5	3	4	4	4	1	1	3	3	3	5	1	4	4	4	3	2	3	4		1			1				1
OVT119	1	1	5	18	1	0	24.7808	93	180	28.7037	1	2	5	4	2	1	1	1	2	5	5	5	2	2	4	4	2	1	1	4	3	5	2	1	2	0	2	4	4	0	0								0
OVT16	2	1	5	12	0		23.1616	58	163	21.83	2	3	4	0	1	3	1	1	2	5	5	5	2	3	4	0	2	1	2	2	3	4	1	3	3	3	4	3	4	4	0								2
OVT20	2	2	6	84	0		23.3945	58	156	23.833	2	3	5	4	2	4	0	2	3	3	5	5	3	2	4	0	1	1	3	4	4	5	1	3	3	3	4	2	2	0		1			1	1			2
OVT22	2	3	6	216	0		21.1644	54	156	22.1893	2	2	4	0	2	2	1	1	3	4	4	4	3	3	4	0	2	1	2	1	1	5	1	4	4	4	2	2	3	4		1				1	1		1
OVT48	2	4	7	24	1	0	24.9397	55	160	21.4844	2	3	5	0	1	1	0	1	3	5	5	6	4	4	0	0	1	1	3	1	0	3	1	3	3	3	4	4	4	0	0								0
OVT50	2	1	4	4	1	0	27.7342	68	158	27.2392	2	3	5	4	1	3	2	1	2	4	3	3	3	2	4	0	2	2	1	0	1	3	1	3	3	3	3	3	3	0	0								0
OVT52	2	1	5	2	0		20.5945	65	172	21.9713	2	4	5	4	2	3	1	1	3	6	6	4	2	3	4	4	2	1	1	1	1	4	1	3	4	4	2	3	1	0	0								0
OVT61	2	1	6	120	1	1	35.5233	80	180	24.6914	1	3	5	4	2	3	1	2	2	5	6	6	3	3	4	4	3	1	2	1	3	5	1	3	3	3	2	2	1	4	0								0
OVT67	2	1	7	60	0		26.4822	80	173	26.7299	1	3	5	4	3	3	0	3	3	6	5	5	4	4	0	4	2	1	3	4	3	5	1	3	3	3	3	2	4	4		1					1		2
OVT69	2	1	5	60	0		26.3863	75	179	23.4075	1	3	5	0	2	1	2	1	3	4	4	3	2	3	4	4	1	2	1	0	4	4	2	3	2	3	2	2	1	0	0								0
OVT73	2	2	5	72	0		33.7699	84	170	29.0657	1	3	5	0	1	1	1	0	2	4	5	5	2	4	4	0	1	1	3	4	3	4	2	1	1	3	4	4	4	4	0								1
OVT80	2	3	7	18	1	0	26.4301	88	177	28.089	1	2	5	4	1	1	1	1	3	5	6	5	3	2	0	4	2	1	3	2	3	4	1	3	3	4	4	3	3	4	0								1
OVT83	2	1	5	12	1	0	30.5973	78	171	26.6749	2	3	4	4	3	4	0	1	1	4	5	4	3	3	4	0	3	3	1	1	1	5	1	3	3	1	4	2	2	0		1	1						1
OVT84	2	1	5	168	1	0	21.1507	45	158	18.026	2	2	5	4	1	3	0	1	2	4	5	4	2	2	4	4	2	1	3	1	4	5	1	2	4	3	2	3	3	0		1		1					1
OVT111	2	1	5	240	1	0	26.9315	68	166	24.677	1	1	4	0	1	1	0	1	3	4	7	5	2	4	4	0	1	1	3	1	4	3	1	3	3	3	4	4	3	0		1				1			3
OVT120	2	1	5	96	1	1	34.3123	98	181	29.9136	1	2	5	4	2	2	0	1	3	4	5	5	2	2	4	0	2	3	4	1	1	4	1	2	3	1	4	4	4	4	0								0
OVT123	2	1	5	24	1	1	22.9808	88	180	27.1605	1	2	5	4	2	3	2	2	3	3	4	5	3	2	4	4	2	2	3	3	4	5	1	3	4	4	4	3	2	4	0								0
OVT125	2	1	6	24	1	1	20.8164	70	158	28.0404	2	4	5	4	2	3	2	2	3	4	3	3	3	4	4	0	4	2	4	3	3	5	1	2	4	4	4	2	2	0	0								0
OVT129	2	1	5	84	1	1	29.4603	60	164	22.3081	2	1	4	4	0	1	2	0	1	6	5	6	2	4	0	0	3	3	2	1	0	5	1	4	3	3	3	1	3	0	0								0
OVT131	2	3	7	48	0		27.8877	78	178	24.6181	1	1	5	4	0	1	0	1	4	2	2	7	4	2	0	0	4	0	4	4	4	5	1	4	4	4	4	4	4	4	0								0
OVT132	2	3	5	41	1	0	21.9479	67	162	25.5296	1	2	5	4	2	3	1	1	3	5	6	3	2	2	0	4	3	3	4	4	4	5	1	3	3	2	4	4	4	0		1	1	1		1		1	2
OVT7	3	1	4	12	0		25.7041	78	180	24.0741	1	2	5	0	1	2	0	0	3	4	5	5	2	2	0	0	2	1	3	3	4	5	1	3	2	2	4	3	4	4		1		1					1
OVT9	3	1	4	12	1	0	23.537	70	180	21.6049	1	2	5	0	2	2	2	2	1	4	5	5	2	2	4	0	2	1	2	2	3	5	1	2	3	2	4	4	3	4		1			1	1			2
OVT11	3	1	5	18	0		27.9699	73	175	23.8367	1	2	4	0	1	3	0	0	2	5	5	5	2	4	0	4	1	0	2	3	2	5	1	3	3	2	3	3	3	4	0								0
OVT23	3	1	7	5	0		36.0767	83	181	25.335	1	3	5	4	0	4	0	2	2	5	6	6	3	2	4	4	1	2	2	4	2	5	1	3	3	1	3	2	2	4		1			1	1			1
OVT24	3	1	7	120	1	1	35.5973	68	172	22.9854	1	3	5	4	1	2	1	1	2	7	5	5	3	2	0	0	2	2	3	4	3	5	1	3	3	3	4	4	4	4		1		1	1				2
OVT28	3	1	6	2	1	0	35.0767	80	174	26.4236	1	3	5	4	2	3	3	0	4	6	3	4	3	4	4	4	4	3	3	3	4	5	1	2	4	4	4	2	1	4		1				1			1
OVT29	3	1	5	48	1	1	23.0219	65	173	21.7181	1	2	5	4	1	3	0	2	2	5	5	4	2	4	4	4	3	2	4	3	2	5	1	3	2	1	2	3	2	0		1		1					2
OVT31	3	1	6	6	1	1	25.5041	70	170	24.2215	2	3	5	4	2	4	1	2	2	4	4	3	2	3	4	4	3	4	2	3	3	5	1	3	4	4	3	3	3	0		1			1	1			1
OVT33	3	1	4	156	0		35.9644	96	183	28.6661	1	3	5	4	2	2	1	2	2	5	5	5	2	4	4	0	1	2	4	4	4	5	1	2	3	4	4	4	3	4		1						1	1
OVT39	3	1	4	18	1	0	24.0877	70	172	23.6614	2	4	5	4	3	4	0	0	4	6	5	5	3	4	4	0	1	0	4	3	0	4	2	2	2	3	4	4	4	0	0								0
OVT40	3	1	5	120	1	1	27.4027	51	162	19.433	2	3	5	4	1	1	0	1	3	5	5	5	2	4	4	0	1	0	3	3	2	5	1	3	3	4	2	2	2	0	0								0
OVT46	3	1	4	48	0		32.3753	80	174	26.4236	1	4	5	4	4	3	3	3	4	6	4	3	3	3	4	4	2	4	3	1	0	4	1	3	2	4	4	4	4	0		1	1	1		1			2
OVT51	3	1	4	72	0		30.3205	62	166	22.4996	1	1	5	0	0	2	0	2	2	4	4	5	2	2	4	4	2	1	3	1	1	4	1	3	4	3	4	3	3	0	0								0
OVT60	3	1	4	12	0		28.1562	75	168	26.5731	2	3	4	4	3	3	1	1	1	4	5	4	2	2	4	0	1	1	4	1	3	3	2	1	3	3	3	1	1	0		1		1					3
OVT74	3	1	5	36	0		23.9425	65	159	25.711	2	2	5	4	0	2	0	1	4	6	6	5	2	4	4	0	2	1	3	3	2	4	1	2	3	2	4	3	3	4	0								0
OVT85	3	1	4	4	0		28.8521	79	170	27.3356	1	4	4	4	1	2	1	1	2	4	4	4	2	2	4	0	3	2	2	1	3	4	1	3	4	2	4	3	3	4		1	1	1		1			3
OVT92	3	1	5	120	0		29.7644	87	182	26.2649	1	3	5	0	0	1	0	0	3	5	5	6	2	3	4	0	1	1	4	3	0	4	1	2	2	2	4	4	2	0	0								2
OVT94	3	1	5	12	0		28.8356	70	163	26.3465	1	3	4	0	1	4	2	0	2	5	2	5	2	2	4	0	2	3	4	3	2	5	1	3	4	2	4	2	1	0	0								0
OVT96	3	1	4	1	0		23.6767	50	159	19.7777	2	3	5	4	2	3	2	2	3	4	4	6	1	2	4	0	3	0	2	2	1	3	1	4	4	4	2	2	2	0		1			1	1			2
OVT97	3	2	5	6	1	0	20.6767	66	179	20.5986	1	2	5	0	0	2	2	1	4	3	2	6	2	2	0	0	2	2	4	1	4	5	1	3	4	4	4	4	1	4	0								0
OVT98	3	1	6	36	0		27.7068	78	179	24.3438	1	3	5	0	2	3	4	2	4	5	7	6	2	2	0	0	0	0	3	1	4	5	1	4	4	4	4	4	4	4		1				1			2
OVT99	3	1	6	36	0		24.5151	82	176	26.4721	1	2	5	0	1	3	1	1	1	5	5	5	3	3	4	4	2	2	1	4	4	4	1	4	4	0	4	4	4	0	0								0
OVT100	3	1	4	12	0		18.8904	73	184	21.5619	1	3	5	4	4	4	0	0	4	5	5	2	2	4	4	0	4	4	4	3	0	5	1	4	4	4	4	2	4	0	0								0
OVT101	3	2	6	6	1	1	17.4877	55	155	22.8928	2	2	5	4	2	3	0	1	4	3	4	4	3	3	0	0	2	2	3	4	3	5	1	3	4	4	3	4	2	4		1					1	1	2
OVT102	3	1	5	6	1	1	21.0055	58	164	21.5645	2	2	5	0	2	3	0	1	3	5	5	5	2	3	4	0	2	1	2	4	3	5	1	2	3	4	4	4	2	4	0								0
OVT105	3	1	4	1	1	1	36.7178	70	177	22.3435	2	4	4	4	4	4	0	2	3	4	4	4	2	2	4	0	2	2	2	3	2	4	1	2	3	3	4	3	3	4		1		1	1				4
OVT106	3	2	6	24	0		34.5397	59	160	23.0469	2	3	4	4	1	2	0	0	4	5	6	5	3	2	0	0	3	2	4	4	4	5	1	3	4	4	3	3	3	4		1		1					2
OVT107	3	1	4	24	1	0	26.7178	74	174	24.4418	1	3	4	4	1	2	0	0	2	5	6	5	2	4	4	4	0	1	3	4	3	5	1	3	3	3	4	4	3	4	0								0
OVT110	3	1	4	72	0		24.9397	87	180	26.8519	1	3	4	4	2	3	0	1	2	4	5	5	1	3	4	4	1	1	3	3	3	4	1	2	3	2	4	3	3	0		1			1	1			2
OVT112	3	1	4	18	0		26.2192	83	180	25.6173	1	2	4	4	2	3	0	1	1	4	4	3	1	3	4	0	3	1	0	1	1	3	2	4	4	4	4	4	3	0	0								0
OVT113	3	1	5	24	1	0	21.4329	50	165	18.3655	2	2	4	4	4	4	2	2	1	6	4	2	3	4	4	4	4	2	1	4	4	5	1	2	1	3	2	3	4	4		1			1				3
OVT121	3	3	7	120	0		43.9315	97	180	29.9383	1	4	5	0	1	4	0	0	4	7	7	3	3	2	0	0	4	0	4	4	3	5	1	3	2	4	4	4	2	0		1	1						2
OVT122	3	1	5	12	0		31.6438	90	189	25.1953	1	4	0	4	2	4	1	2	1	4	4	5	2	2	4	0	2	1	1	0	1	5	1	2	2	3	3	4	4	0		1		1					1
OVT124	3	1	5	120	1	1	29.1151	55	153	23.4952	2	3	5	0	2	3	0	0	1	5	4	5	1	4	0	0	2	0	4	4	4	5	1	4	4	3	4	1	4	4		1				1			3
OVT126	3	1	7	2	1	0	29.9479	66	165	24.2424	2	3	0	0	3	4	0	0	3	4	5	4	4	2	4	4	4	3	3	4	2	5	1	4	3	3	3	3	4	0	0								0
OVT127	3	1	4	6	0		25.0986	63	163	23.7118	2	3	5	4	2	3	1	1	3	3	4	3	0	4	4	4	2	0	4	4	4	5	1	3	2	4	3	2	2	0		1			1				3
OVT128	3	1	5	12	0		33.5178	63	167	22.5896	2	3	5	4	0	2	1	0	4	6	6	6	2	2	0	4	1	1	4	1	3	5	1	3	4	4	4	4	4	4	0								0
OVT130	3	2	5	24	1	1	22.4932	99	182	29.8877	1	2	4	4	0	2	1	0	4	5	3	6	2	4	4	0	3	4	4	4	4	5	1	2	3	4	4	4	4	0	0								0
[truncated: 77 more columns]
